# Supplementary material for: Nonvolatile bistable resistive switching in a new polyimide bearing 9-phenyl-9H-carbazole pendant
Source: Royal Society of Chemistry journal article supplement (doi:10.1039/c1jm13849a), 2011-11-01
Supplement: c1jm13849a.pdf [file c1jm13849a.pdf]

## **Nonvolatile bistable resistive switching in a new polyimide bearing**

### **9-phenyl-9H-carbazole pendant**

Benlin Hu,<sup>ab</sup> Fei Zhuge,<sup>\*ab</sup> Xiaojian Zhu,<sup>ab</sup> Shanshan Peng,<sup>ab</sup> Xinxin  
Chen,<sup>ab</sup> Liang Pan,<sup>ab</sup> Qing Yan<sup>ab</sup> and Run-Wei Li<sup>\*ab</sup>

<sup>a</sup>*Key Laboratory of Magnetic Materials and Devices, Ningbo Institute of Material  
Technology and Engineering, Chinese Academy of Sciences, Ningbo 315201, China*

<sup>b</sup>*Zhejiang Province Key Laboratory of Magnetic Materials and Application  
Technology, Ningbo Institute of Material Technology and Engineering, Chinese  
Academy of Sciences, Ningbo 315201, China*

---

<sup>\*</sup>*E-mail: zhugefei@nimte.ac.cn, runweili@nimte.ac.cn*

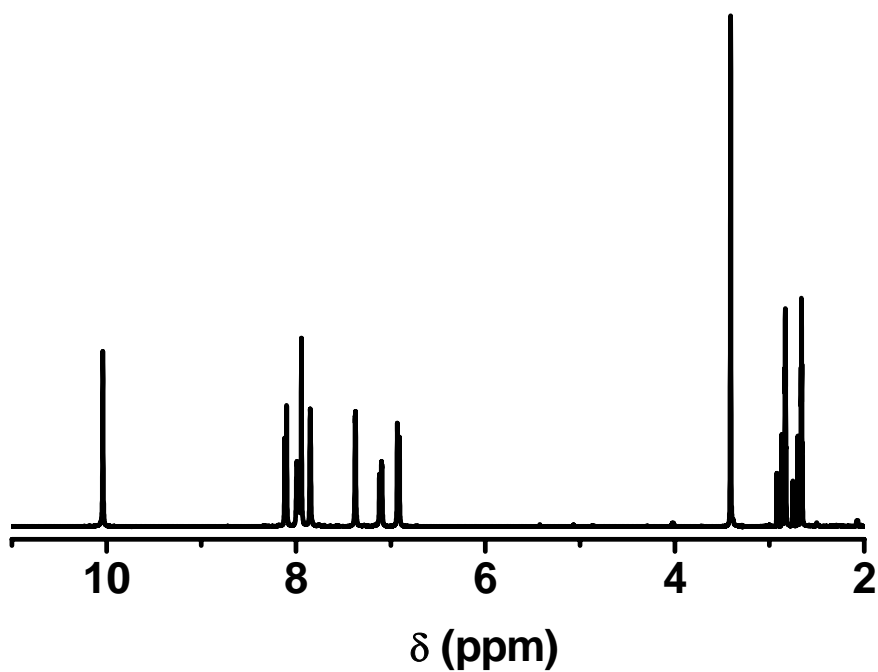

Fig. S1 Original <sup>1</sup>H NMR spectrum of 6F-BAHP PI

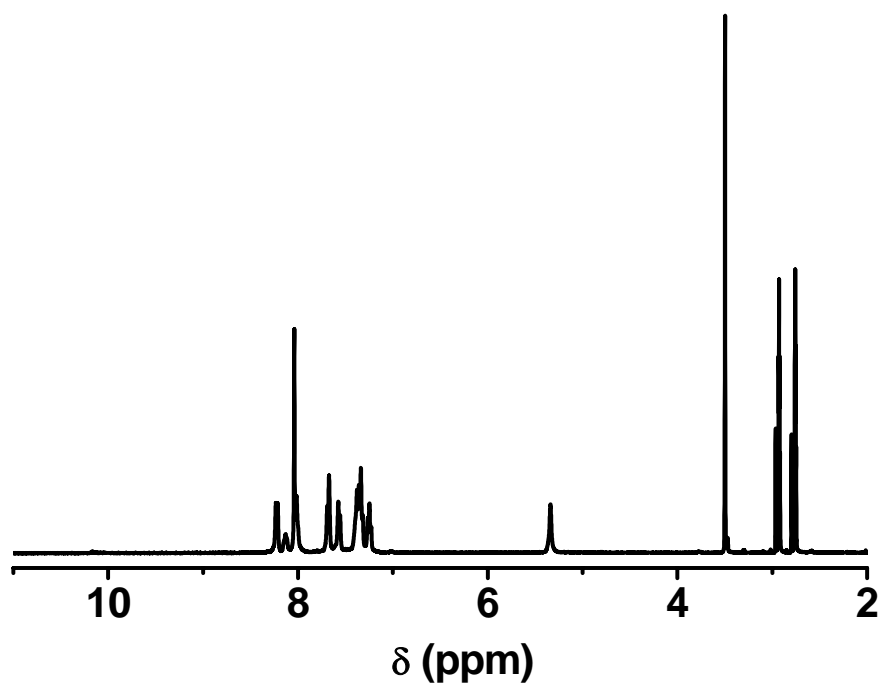

Fig. S2 Original <sup>1</sup>H NMR spectrum of 6F-BAHP-PC PI
